## Induction and Maintenance Characteristics of Anesthesia with Desflurane and Nitrous Oxide in Infants and Children

Maurice S. Zwass, M.D.,\* Dennis M. Fisher, M.D.,† Leila G. Welborn, M.D.,‡ Charles J. Coté, M.D.,§  
Peter J. Davis, M.D.,¶ Miles Dinner, M.D.,\*\* Raafat S. Hannallah, M.D.,†† Letty M. P. Liu, M.D.,§  
Joel Sarnar, M.D.,§§ Willis A. McGill, M.D.,†† James K. Alifimoff, M.D.,‡‡  
Pat B. Embree, C.R.N.A.,¶¶ D. Ryan Cook, M.D.\*\*\*

To determine the induction and maintenance characteristics of desflurane in pediatric patients, the authors anesthetized 206 infants and children aged 1 month to 12 yr with nitrous oxide plus desflurane and/or halothane in oxygen. Patients were assigned to one of four groups: anesthesia was 1) induced and maintained with desflurane after premedication with an oral combination of meperidine, diazepam, and atropine; 2) induced and maintained with desflurane; 3) induced with halothane and maintained with desflurane; or 4) induced and maintained with halothane. An unblinded observer recorded time to loss of consciousness (lid reflex), time to intubation, and clinical characteristics of the induction and maintenance of anesthesia. Moderate-to-severe laryngospasm (49%) and moderate-to-severe coughing (58%) occurred frequently during induction of anesthesia with desflurane; the incidence of these was not altered by premedication. In contrast, laryngospasm and coughing were rare during induction of anesthesia with halothane. In unpremedicated patients, time to loss of lid reflex (mean  $\pm$  SD) was similar for desflurane ( $2.4 \pm 1.2$  min) and halothane ( $2.1 \pm 0.8$  min). During induction of anesthesia, before laryngoscopy and intubation, mean arterial pressure  $< 80\%$  of baseline was more common with halothane; heart rate and mean arterial pressure  $> 120\%$  of baseline

were more common with desflurane. Intraoperatively, heart rate  $> 120\%$  of baseline was more common with desflurane; blood pressures were similar for the two anesthetics. The authors conclude that the high incidence of airway complications during induction of anesthesia with desflurane limits its utility for inhalation induction in pediatric patients. Anesthesia can be safely maintained with desflurane if induced with a different anesthetic. (Key words: Anesthesia, pediatric; desflurane; halothane. Anesthetics: nitrous oxide. Anesthetics, volatile: desflurane; halothane. Complications: hypoxemia; laryngospasm.)

DESFLURANE'S low blood-gas partition coefficient, similar to that of nitrous oxide ( $N_2O$ ),<sup>1</sup> should result in rapid induction of anesthesia. However, desflurane's pungency may limit the rate at which its inspired concentration can be increased, thereby slowing the rate at which anesthesia can be induced. Although preliminary trials have demonstrated that anesthesia can be induced with  $N_2O$  and desflurane in unpremedicated young adults without significant laryngospasm,<sup>2</sup> similar trials have not been conducted in children. To evaluate whether desflurane, administered with  $N_2O$ , is a desirable anesthetic for induction and maintenance of anesthesia in children, we compared the clinical characteristics of desflurane and halothane, including whether anesthetic premedication altered the incidence of desflurane-induced airway complications.

### Materials and Methods

After obtaining approval from the Institutional Review Board of each of the participating institutions (University of California, San Francisco; Children's National Medical Center, Washington, D.C.; Massachusetts General Hospital, Boston; Children's Hospital of Pittsburgh; and New York Hospital, New York City), we obtained informed written consent from the parents of 206 ASA physical status 1 or 2 children undergoing a variety of elective minor surgical procedures (table 1). Exclusion criteria included age less than one month or more than 12 yr; history of premature birth; preexisting pulmonary, cardiac, renal, central nervous, metabolic or neuromuscular disease; gastroesophageal reflux; or concurrent treatment with opioid, sedative, or anticonvulsant agents.

Initially, patients were randomized to one of four groups (table 1). Patients in the first group received an

\* Assistant Professor of Anesthesia and Pediatrics, University of California.

† Professor of Anesthesia and Pediatrics, University of California.

‡ Associate Professor of Anesthesiology and Pediatrics, George Washington University.

§ Associate Professor of Anaesthesia, Harvard Medical School.

¶ Associate Professor of Anesthesiology/Critical Care Medicine and Pediatrics, University of Pittsburgh.

\*\* Assistant Professor of Anesthesia, Cornell University Medical Center.

†† Professor of Anesthesiology and Pediatrics, George Washington University.

‡‡ Assistant Professor of Anaesthesia, Harvard Medical School.

§§ Assistant Professor of Anesthesiology/Critical Care Medicine, University of Pittsburgh.

¶¶ Clinical Research Coordinator, Cornell University Medical Center.

\*\*\* Professor of Anesthesiology/Critical Care Medicine and Pharmacology, University of Pittsburgh.

Received from the Department of Anesthesia, University of California, San Francisco; Department of Anesthesia, Children's National Medical Center, Washington, D.C.; Department of Anaesthesia, Harvard Medical School at the Massachusetts General Hospital, Boston; Department of Anesthesia, University of Pittsburgh; and Department of Anesthesia, Cornell University Medical Center, New York City. Accepted for publication November 12, 1991. Supported in part by Anaquest, Inc. Presented in part at the Annual Meeting of the International Anesthesia Research Society, San Antonio, Texas, March 1991.

Address reprint requests to Dr. Fisher: Department of Anesthesia, University of California, San Francisco, California 94143-0648.

TABLE 1. Demographic Data for Patients Undergoing Anesthesia with Desflurane, Halothane, or Induction of Anesthesia with Halothane and Maintenance with Desflurane (Crossover)

|                                             | Desflurane,<br>Premedication | Desflurane, No<br>Premedication | Crossover       | Halothane       |
|---------------------------------------------|------------------------------|---------------------------------|-----------------|-----------------|
| Premedication                               | Yes                          | No                              | No              | No              |
| Induction anesthetic agent                  | Desflurane                   | Desflurane                      | Halothane       | Halothane       |
| Maintenance anesthetic agent                | Desflurane                   | Desflurane                      | Desflurane      | Halothane       |
| n                                           | 23                           | 22                              | 80              | 81              |
| Age (months, mean $\pm$ SD)                 | 59 $\pm$ 41                  | 48 $\pm$ 40                     | 43 $\pm$ 41     | 43 $\pm$ 35     |
| Weight (kg, mean $\pm$ SD)                  | 19.8 $\pm$ 9.7               | 17.2 $\pm$ 9.0                  | 17.6 $\pm$ 15.5 | 17.9 $\pm$ 15.3 |
| Patients aged <1 yr (%)                     | 13                           | 18                              | 30              | 20              |
| Outpatients (%)                             | 84                           | 82                              | 74              | 79              |
| Duration of anesthesia (min, mean $\pm$ SD) | 79 $\pm$ 51                  | 67 $\pm$ 44                     | 70 $\pm$ 59     | 73 $\pm$ 54     |
| Surgical procedures (%)                     |                              |                                 |                 |                 |
| General surgical                            | 43                           | 27                              | 38              | 43              |
| Genitourologic                              | 30                           | 14                              | 26              | 12              |
| Plastic                                     | 13                           | 36                              | 10              | 12              |
| Other                                       | 13                           | 23                              | 26              | 26              |
| Regional analgesia (%)                      |                              |                                 |                 |                 |
| None                                        | 14                           | 32                              | 29              | 30              |
| Ilioinguinal block                          | 18                           | 14                              | 11              | 9               |
| Local infiltration                          | 18                           | 27                              | 29              | 30              |
| Caudal or epidural block                    | 45                           | 23                              | 28              | 28              |
| Other                                       | 5                            | 5                               | 1               | 1               |

There were no differences between groups. Percentage values may not total 100% because of rounding.

oral combination of meperidine 1.5 mg/kg, diazepam 0.15 mg/kg, and atropine 20  $\mu$ g/kg, in a total volume of 0.25 ml/kg, 20–40 min prior to induction of anesthesia.<sup>3</sup> Anesthesia was induced with desflurane vaporized in 60% N<sub>2</sub>O and 40% oxygen (O<sub>2</sub>) using flows of 5–10 l/min through a circle system or a Mapleson D circuit; desflurane was vaporized by a modified Ohmeda DM-5000 vaporizer (Ohmeda, Madison, WI). In the second group, patients received no premedication, and anesthesia was induced with desflurane in N<sub>2</sub>O and O<sub>2</sub> as for the first group. Patients in the third and fourth groups were not premedicated and underwent induction of anesthesia with halothane in N<sub>2</sub>O (60%) and O<sub>2</sub> at flows of 5–10 l/min.

For all groups, the inspired concentration of the potent anesthetic was increased at a rate of approximately 1.5% desflurane or 0.5% halothane per three breaths. All patients underwent tracheal intubation without the use of muscle relaxants (except patients who required succinylcholine to treat laryngospasm). After tracheal intubation, anesthesia was maintained with N<sub>2</sub>O and the same potent agent was used for induction in all but the third group, which underwent induction with N<sub>2</sub>O/halothane followed by maintenance with N<sub>2</sub>O/desflurane (crossover). When the 85 initial studies (45 with desflurane) demonstrated an unacceptably high incidence of laryngospasm and other airway-related difficulties during induction of anesthesia with desflurane (both with and without premedication), no additional patients were enrolled in the first two groups; *i.e.*, all remaining patients were unpremedicated and underwent induction with halothane and N<sub>2</sub>O

and maintenance with either halothane or desflurane and N<sub>2</sub>O.

During surgery, patient's lungs were mechanically or manually ventilated to maintain end-tidal CO<sub>2</sub> tension between 35 and 45 mmHg. Temperature was kept at >35° C. Vecuronium was administered for muscle relaxation when surgically indicated. Prior to incision, the inspired concentration of desflurane or halothane was adjusted to prevent movement (based on values for MAC in O<sub>2</sub><sup>4,5</sup>). Following incision, inspired concentrations of desflurane or halothane were adjusted as clinically indicated to maintain heart rate and arterial blood pressure within 30% of baseline values; N<sub>2</sub>O concentrations were maintained at 60%. No additional intravenous or inhaled anesthetics or analgesics were administered during surgery. Atropine was administered at the discretion of the attending anesthesiologist to increase heart rate or to dry secretions. Prior to completion of surgery, if appropriate, a regional block was performed to provide postoperative analgesia (table 1). At completion of surgery, residual neuromuscular blockade was antagonized with neostigmine and atropine, and administration of inhaled anesthetic drugs was discontinued.

Arterial blood pressure and heart rate were noted preoperatively (baseline). These parameters, O<sub>2</sub> saturation by pulse oximetry (SpO<sub>2</sub>), and end-tidal concentrations of potent inhalational agent and CO<sub>2</sub> were recorded every two min prior to incision, every min during the first ten min following incision, then every five min throughout surgery. Concentrations of desflurane or halothane, CO<sub>2</sub>, and N<sub>2</sub>O, sampled at the connection between the circuit

and the mask or at the proximal end of the endotracheal tube, were measured using infrared absorption spectroscopy (Datex PB254, Puritan-Bennett, Tewksbury, MA for desflurane; and RGM 5250, Ohmeda for halothane). The time intervals between placement of the face mask and loss of lash reflex (loss of consciousness) and mask placement and tracheal intubation were noted. The incidence of excitement was recorded and airway-related complications such as laryngospasm, breathholding, coughing, and secretions were graded. Laryngospasm was graded as none, mild (no decrease in  $Sp_{O_2}$ ), moderate (decreasing  $Sp_{O_2}$ ), or severe ( $Sp_{O_2} < 90\%$  or succinylcholine administered). Breathholding was graded as none, mild ( $< 10$  s), moderate ( $> 10$  s), or severe (decreasing  $Sp_{O_2}$ ). Coughing was graded as none, mild (fewer than three coughs), moderate (three or more coughs), or severe (decreasing  $Sp_{O_2}$ ). Secretions were graded as none, mild, moderate (requiring suctioning), or copious (compromising ventilation). Also recorded were the use of succinylcholine to treat laryngospasm, incidence of  $Sp_{O_2} < 90\%$ , and discontinuation of  $N_2O$  during induction of anesthesia due to airway-related complications. During emergence and recovery from anesthesia, the end-tidal anesthetic concentration at discontinuation of anesthetic gases ( $F_{last}$ ), duration of anesthesia, and the time from discontinuation of anesthetic drugs to eye-opening (at which time the trachea was extubated) were recorded. In the postanesthesia recovery room, we recorded heart rate and arterial blood pressure at 15-min intervals, the incidence of vomiting, the time to satisfy discharge criteria (modified Aldrete score), and whether the patient exhibited or complained of pain and was administered an opioid. All observations were made by an unblinded observer.

The effects of premedication on the incidence of airway complications was evaluated using chi-square analysis. For unpremedicated patients, differences between crossover, desflurane, and halothane groups were determined, as appropriate, using chi-square or parametric or nonparametric analysis of variance with the Student-Newman-Keuls test. Because  $F_{last}$  represented a greater fraction of MAC for the halothane group than for the crossover and desflurane groups, emergence and recovery times were not compared. In addition, values for emergence and recovery times do not include data from one institution that deviated from that portion of the protocol. For all statistical comparisons,  $P < 0.05$  was considered significant.

## Results

The four groups were comparable in age, weight, type of surgical procedures, and percentage of patients undergoing procedures as outpatients (table 1). As noted above, fewer patients were enrolled in the groups undergoing induction of anesthesia with desflurane because of

the high incidence of airway-related complications noted in the initial studies.

Induction of anesthesia with desflurane with or without premedication resulted in an incidence of moderate or severe coughing of 58%, moderate or severe laryngospasm of 49%, moderate or severe breathholding of 29%, moderate or copious secretions of 36%, and excitement of 51% (table 2). As a result of these airway complications,  $Sp_{O_2}$  decreased to  $< 90\%$  in 22% of patients;  $N_2O$  was discontinued in 21%; and succinylcholine was required to treat severe laryngospasm in 29%. Premedication did not alter the severity or incidence of airway-related complications. In contrast, the incidence of airway-related complications was low during induction of anesthesia with halothane: only 2% of patients required discontinuation of  $N_2O$  and/or administration of succinylcholine.

In unpremedicated patients, loss of consciousness and tracheal intubation occurred at similar times for the crossover, desflurane, and halothane groups (table 3) and were not influenced by the administration of succinylcholine. During induction of anesthesia, inspired anesthetic concentrations were comparable for the crossover and halothane groups (table 4); during maintenance of anesthesia and at discontinuation of anesthesia (at which times the crossover group was receiving desflurane), end-tidal anesthetic concentrations were similar for the crossover and desflurane groups.

During the first 4 min of anesthesia, heart rate and mean blood pressure  $> 120\%$  of baseline were more common with desflurane (table 5). Mean blood pressure  $< 80\%$  of baseline was more common with crossover and halothane. During maintenance of anesthesia, heart rate  $> 120\%$  of baseline was more common with desflurane and crossover; the incidence of dysrhythmias was similar for the three groups, and blood pressures did not differ. During recovery from anesthesia, there were no differences between groups in heart rate or blood pressure. During recovery from anesthesia, more patients who received desflurane required supplemental opioids (table 6). The incidence of vomiting was greater with halothane than with desflurane or crossover despite the lesser use of opioids.

In several patients, desflurane concentrations were increased progressively to as high as 15–25% end-tidal in response to clinical signs interpreted as light anesthesia (tachycardia and hypertension but not movement). In two instances, these high inspired desflurane concentrations resulted in mild arterial desaturation, necessitating a decrease in the inspired  $N_2O$  concentration.

## Discussion

Desflurane's low blood solubility, similar to that of  $N_2O$  and less than that of other commonly used potent inhaled

TABLE 2. The Percentage of Patients Experiencing Airway-related Complications during Induction of Anesthesia with Desflurane with or without Premedication or Induction of Anesthesia with Halothane

|                                                                      | Desflurane               |                           |                              | Halothane (Includes Crossover)<br>(n = 161) |
|----------------------------------------------------------------------|--------------------------|---------------------------|------------------------------|---------------------------------------------|
|                                                                      | All Patients<br>(n = 45) | Premedication<br>(n = 23) | No Premedication<br>(n = 22) |                                             |
| Coughing                                                             |                          |                           |                              |                                             |
| None                                                                 | 16                       | 9                         | 22                           | 89                                          |
| Mild                                                                 | 27                       | 26                        | 27                           | 7                                           |
| Moderate                                                             | 20                       | 17                        | 23                           | 3                                           |
| Severe                                                               | 38                       | 35                        | 41                           | 1                                           |
| Laryngospasm                                                         |                          |                           |                              |                                             |
| None                                                                 | 33                       | 30                        | 36                           | 97                                          |
| Mild                                                                 | 18                       | 30                        | 5                            | 1                                           |
| Moderate                                                             | 13                       | 9                         | 18                           | 2                                           |
| Severe                                                               | 36                       | 30                        | 41                           | 1                                           |
| Breathholding                                                        |                          |                           |                              |                                             |
| None                                                                 | 49                       | 48                        | 50                           | 96                                          |
| Mild                                                                 | 22                       | 30                        | 14                           | 4                                           |
| Moderate                                                             | 18                       | 13                        | 23                           | 0                                           |
| Severe                                                               | 11                       | 9                         | 14                           | 1                                           |
| Secretions                                                           |                          |                           |                              |                                             |
| None                                                                 | 36                       | 48                        | 23                           | 94                                          |
| Mild                                                                 | 29                       | 22                        | 36                           | 4                                           |
| Moderate                                                             | 31                       | 22                        | 41                           | 2                                           |
| Copious                                                              | 4                        | 9                         | 0                            | 0                                           |
| Excitement                                                           |                          |                           |                              |                                             |
| Absent                                                               | 49                       | 57                        | 41                           | 89                                          |
| Present                                                              | 51                       | 43                        | 59                           | 11                                          |
| SpO <sub>2</sub> < 90%                                               |                          |                           |                              |                                             |
| No                                                                   | 78                       | 91                        | 64                           | 99                                          |
| Yes                                                                  | 22                       | 9                         | 36                           | 1                                           |
| Nitrous oxide discontinued secondary to airway-related complications |                          |                           |                              |                                             |
| No                                                                   | 80                       | 87                        | 71                           | 98                                          |
| Yes                                                                  | 20                       | 13                        | 29                           | 2                                           |
| Succinylcholine administered to treat laryngospasm                   |                          |                           |                              |                                             |
| No                                                                   | 71                       | 74                        | 68                           | 98                                          |
| Yes                                                                  | 29                       | 26                        | 32                           | 2                                           |

Data for patients in the desflurane groups are displayed twice, first for all patients and then separated by whether a premedication was administered.

There was no difference between the two desflurane groups. For

all variables, halothane differed from the desflurane, no-premedication group ( $P < 0.05$  by chi-square analysis); no comparisons were made between the halothane group and the desflurane, premedication group. Percentage values may not total 100% due to rounding.

anesthetics, should permit a rapid increase in the rate at which alveolar concentration approaches the inspired concentration, thereby facilitating induction of anesthesia. However, induction of anesthesia with desflurane and

N<sub>2</sub>O in pediatric patients produced many airway-related complications, including coughing and laryngospasm, frequently necessitating administration of succinylcholine. Desflurane's pungency also limits the rate at which its

TABLE 3. Duration of Induction, Maintenance, and Emergence from Anesthesia (minutes) for Unpremedicated Patients

|                                                                                  | Crossover | Desflurane | Halothane |
|----------------------------------------------------------------------------------|-----------|------------|-----------|
| n                                                                                | 80        | 22         | 81        |
| Induction of anesthesia to loss of consciousness                                 | 2.2 ± 0.7 | 2.4 ± 1.2  | 2.1 ± 0.8 |
| Induction of anesthesia to tracheal intubation                                   | 8.4 ± 2.8 | 7.6 ± 4.3  | 8.9 ± 3.6 |
| Induction of anesthesia to tracheal extubation                                   | 70 ± 59   | 67 ± 44    | 73 ± 54   |
| Discontinuation of anesthesia to eye-opening and tracheal extubation             | 5.4 ± 3.3 | 4.0 ± 2.0  | 7.5 ± 3.4 |
| Entry into recovery room to satisfying criteria for discharge from recovery room | 52 ± 55   | 32 ± 32    | 55 ± 33   |

Mean ± SD.

There were no differences between groups; data for emergence and recovery from anesthesia were not compared because of differences

in the end-tidal anesthetic concentration at discontinuation of anesthetic gases (see text).

TABLE 4. Inspired or End-Tidal Anesthetic Concentrations (%)

|                                                    | Crossover              | Desflurane | Halothane |
|----------------------------------------------------|------------------------|------------|-----------|
| n                                                  | 80                     | 22         | 81        |
| Loss of consciousness (inspired)                   | 3.1 ± 1.1 (halothane)  | 10.5 ± 3.7 | 3.1 ± 1.1 |
| Tracheal intubation (inspired)                     | 3.3 ± 1.3 (halothane)  | 13.4 ± 2.8 | 3.1 ± 1.0 |
| Maintenance of anesthesia (end-tidal)              | 6.9 ± 1.6 (desflurane) | 7.5 ± 2.0  | 1.2 ± 0.3 |
| Discontinuation of anesthesia (F <sub>last</sub> ) | 4.1 ± 2.6 (desflurane) | 3.8 ± 2.6  | 0.7 ± 0.4 |

Mean ± SD.

F<sub>last</sub> = the end-tidal anesthetic concentration at discontinuation of anesthetic gases.

inspired concentration can be increased, thereby offsetting the advantages conferred by its low blood solubility. The incidence of these airway complications was similar whether or not a premedication was administered. This disproved our hypothesis that an opioid premedication would ameliorate coughing<sup>6</sup> and that atropine would decrease secretions, further improving airway conditions. Although the high incidence of airway-related complications during induction of anesthesia with desflurane may, in part, reflect our inexperience with this anesthetic, we speculate that desflurane's pungency will result in airway irritation even when anesthesia is induced by clinicians skilled in its administration. The high incidence of airway complications with desflurane in pediatric patients is analogous to the findings with isoflurane<sup>7</sup> (the molecular structure of which differs minimally from that of desflurane), reaffirming the usefulness of halothane as an induction agent for pediatric patients.

The rate at which the inspired desflurane concentration was increased was slower (in MAC fractions) than that of halothane. This may have slowed induction of anesthesia

with desflurane, leaving the patient in a semiconscious state for a longer period, and thereby increasing the likelihood of airway-related complications. The rate at which we increased the inspired desflurane concentration was based on preliminary trials in adults in whom more rapid increases produced airway irritation. It is possible that more rapid increases in the inspired desflurane concentration in pediatric patients might result in a more rapid loss of consciousness with fewer airway complications.

Desflurane's low blood solubility should result in rapid emergence from anesthesia. However, the design of the present study does not permit comparison of emergence from anesthesia with desflurane *vs.* halothane: the end-tidal anesthetic concentration at discontinuation of anesthetic gases was lower for desflurane, thereby confounding any potential benefits of desflurane's low blood solubility. We note that emergence from desflurane anesthesia was rapid, consistent with its low blood solubility. In addition, emergence times for crossover patients were similar to those for desflurane, suggesting that the crossover technique provides halothane's advantages during

TABLE 5. Percentage of Patients Experiencing Cardiovascular Changes during Induction, Maintenance, or Recovery from Anesthesia in the Three Unpremedicated Groups

|                                                        | Crossover<br>(n = 80) | Desflurane<br>(n = 22) | Halothane<br>(n = 81) |
|--------------------------------------------------------|-----------------------|------------------------|-----------------------|
| Heart rate during the first four min of anesthesia     |                       |                        |                       |
| >120 (% of baseline)                                   | 12                    | 43*                    | 18                    |
| <80 (% of baseline)                                    | 26                    | 10                     | 30                    |
| Blood pressure during the first four min of anesthesia |                       |                        |                       |
| >120 (% of baseline)                                   | 13                    | 59*                    | 18                    |
| <80 (% of baseline)                                    | 23                    | 0*                     | 18                    |
| Heart rate during maintenance of anesthesia            |                       |                        |                       |
| >120 (% of baseline)                                   | 25                    | 33                     | 8*                    |
| <80 (% of baseline)                                    | 15                    | 11                     | 5                     |
| Blood pressure during maintenance of anesthesia        |                       |                        |                       |
| >120 (% of baseline)                                   | 15                    | 5                      | 4                     |
| <80 (% of baseline)                                    | 23                    | 14                     | 18                    |
| Dysrhythmias during maintenance of anesthesia          | 2                     | 9                      | 1                     |
| Heart rate during recovery from anesthesia             |                       |                        |                       |
| >120 (% of baseline)                                   | 42                    | 50                     | 34                    |
| <80 (% of baseline)                                    | 14                    | 15                     | 6                     |
| Blood pressure during recovery from anesthesia         |                       |                        |                       |
| >120 (% of baseline)                                   | 37                    | 50                     | 25                    |
| <80 (% of baseline)                                    | 3                     | 5                      | 10                    |

\* Different ( $P < 0.05$ ) from other groups by chi-square analysis.

TABLE 6. The Percentage of Patients Who Required Opioids for Pain or Vomited during Recovery from Anesthesia in the Three Unpremedicated Groups

|                  | Crossover<br>(n = 80) | Desflurane<br>(n = 22) | Halothane<br>(n = 81) |
|------------------|-----------------------|------------------------|-----------------------|
| Required opioids | 29                    | 50*                    | 22                    |
| Vomited          | 8                     | 5                      | 21*                   |

\* Differs from other groups ( $P < 0.05$ ) by chi-square analysis.

induction of anesthesia and desflurane's clinical characteristics during maintenance and emergence from anesthesia. Whether maintenance of anesthesia with desflurane results in more rapid discharge from the recovery room compared to halothane remains to be seen in future clinical studies.

During recovery, more patients anesthetized with desflurane required opioids compared to the halothane and crossover groups, despite similar distributions of surgical procedures and regional anesthetic techniques in the three groups. Because patients in the crossover group received desflurane for the majority of their anesthetic, we are unable to explain this observation. In contrast, Ghouri *et al.*<sup>8</sup> observed that adults given desflurane required fewer doses of opioids than adults anesthetized with isoflurane. Whether anesthesia with desflurane is associated with a greater postoperative analgesic requirement in pediatric patients remains to be determined. We also observed that vomiting was less common in the desflurane and crossover groups than in the halothane group. If this observation is confirmed in larger clinical trials, it suggests a potentially desirable feature of desflurane anesthesia.

Desflurane's cardiovascular effects differ from those of halothane. Whereas halothane minimally affects heart rate,<sup>9</sup> desflurane frequently causes tachycardia (table 5). In unparalyzed patients, desflurane-induced tachycardia in the absence of movement probably does not indicate inadequate anesthesia; however, the present study does not address whether tachycardia (or hypertension) in a paralyzed child necessitates administration of either an opioid or greater concentrations of desflurane.

N<sub>2</sub>O may be less useful as an adjunct to desflurane compared to halothane in pediatric patients because high desflurane concentrations are occasionally required during induction of anesthesia or in response to hypertension or tachycardia: these high desflurane concentrations necessitate decreasing the inspired N<sub>2</sub>O concentration to maintain a constant F<sub>I</sub>O<sub>2</sub>. In addition, Fisher and Zwass<sup>10</sup> demonstrated that 60% N<sub>2</sub>O decreases desflurane's MAC by only 25% in infants and children.

The intention of the investigators participating in this multicenter study was to examine induction, maintenance, and emergence from anesthesia with desflurane. How-

ever, differences between institutions in the management of emergence from anesthesia (*e.g.*, several investigators maintained lighter planes of anesthesia with desflurane than with halothane, thereby favoring rapid emergence and recovery from desflurane anesthesia) prevented us from comparing desflurane to halothane. Despite these differences between institutions, certain aspects of desflurane anesthesia were consistent. Most important of these was the high incidence of airway-related complications during induction of anesthesia. Although institutional differences may limit the utility of multicenter studies, some aspects of desflurane anesthesia were consistent among institutions, suggesting that these problems would occur in clinical practice.

In summary, our findings of a high incidence of airway-related complications during induction of anesthesia with desflurane will probably limit its role as an induction agent in pediatric patients. However, once anesthesia has been successfully induced with another agent, such as halothane (or possibly thiopental or other intravenous anesthetics), desflurane appears to be a satisfactory agent for the maintenance and emergence from anesthesia.

The authors wish to thank the many individuals—anesthesia residents, surgeons, nurses, other colleagues, and Winifred Von Ehrenburg—without whose assistance and support this study would not have been possible.

## References

1. Eger EI II: Partition coefficients of I-653 in human blood, saline, and olive oil. *Anesth Analg* 66:971-3, 1987
2. Rampil IJ, Lockhart SH, Zwass MS, Peterson N, Yasuda N, Eger EI II, Weiskopf RB, Damask MC: Clinical characteristics of desflurane in surgical patients: Minimum alveolar concentration. *ANESTHESIOLOGY* 74:429-433, 1991
3. Brzustowicz RM, Nelson DA, Betts EK, Rosenberry KR, Swedlow DB: Efficacy of oral premedication for pediatric outpatient surgery. *ANESTHESIOLOGY* 60:475-477, 1984
4. Taylor RH, Lerman J: Minimum alveolar concentration of desflurane and hemodynamic responses in neonates, infants, and children. *ANESTHESIOLOGY* 75:975-979, 1991
5. Gregory GA, Eger EI, Munson ES: The relationship between age and halothane requirement in man. *ANESTHESIOLOGY* 30:488-491, 1969
6. Jaffe JH, Martin WR: Opioid analgesics and antagonists. Goodman and Gilman's *The Pharmacologic Basis of Therapeutics*, 7th edition. New York, Macmillan Publishing Company, 1985, pp 491-531
7. Fisher DM, Robinson S, Brett CM, Perin G, Gregory GA: Comparison of enflurane, halothane and isoflurane for outpatient pediatric anesthesia. *ANESTHESIOLOGY* 63:647-650, 1985
8. Ghouri AF, Bodner M, White PF: Recovery profile after desflurane-nitrous oxide *versus* isoflurane-nitrous oxide in outpatients. *ANESTHESIOLOGY* 74:419-424, 1991
9. Wolf WJ, Neal MB, Peterson MD: The hemodynamic and cardiovascular effects of isoflurane and halothane anesthesia in children. *ANESTHESIOLOGY* 64:328-333, 1986
10. Fisher DM, Zwass MS: MAC of desflurane in 60% nitrous oxide in infants and children. *ANESTHESIOLOGY* 76:354-356, 1992
